# Supplementary material for: 80 ウマインフルエンザの発生について : ウイルス分離とHI抗体価 (微生物学分科会)(第73回日本獣医学会)
Source: Royal Society of Chemistry journal article supplement (doi:10.1039/c2cp42566a), 1972-12-25
Supplement: c2cp42566a.pdf [file c2cp42566a.pdf]

## Supporting information

### Factors governing the growth mode of carbon nanotubes on carbon-based substrates

Kyoung Ju Kim<sup>1</sup>, Woong-Ryeol Yu<sup>1\*</sup>, Ji Ho Youk<sup>2</sup>, Jinyong Lee<sup>3</sup>

*<sup>1</sup>Dept of Materials Science and Engineering and Research Institute of Advanced  
Materials, Seoul National University, Seoul 151-742, Korea*

*<sup>2</sup>Dept of Advanced Fiber Engineering, Inha University, Incheon 402-751, Korea*

*<sup>3</sup>High-Temperature Composite Materials Group, Agency for Defense Development, Daejeon 305-600,  
Korea*

Corresponding author : [woongryu@snu.ac.kr](mailto:woongryu@snu.ac.kr)

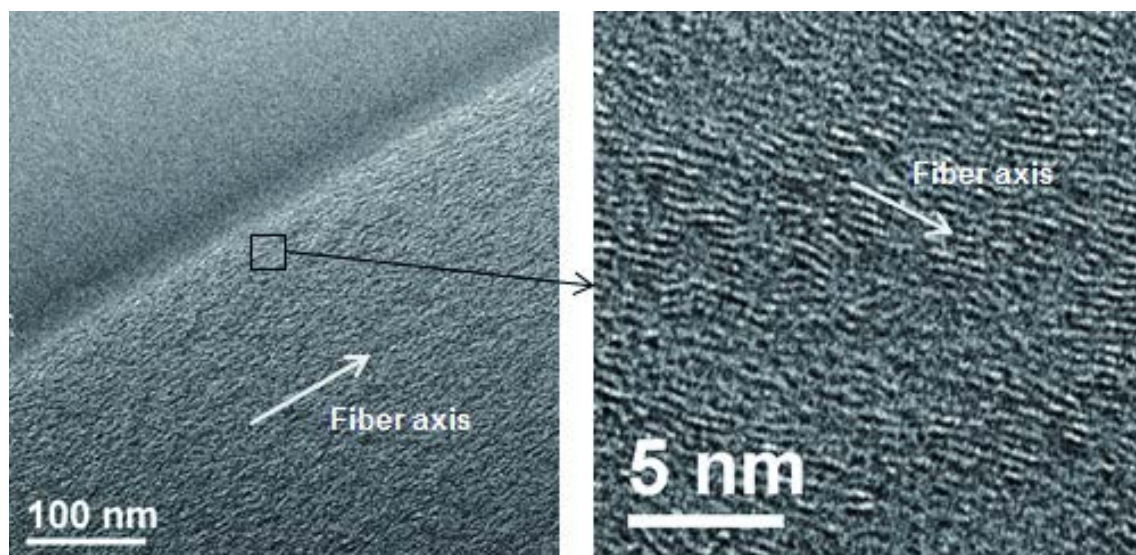

(a)

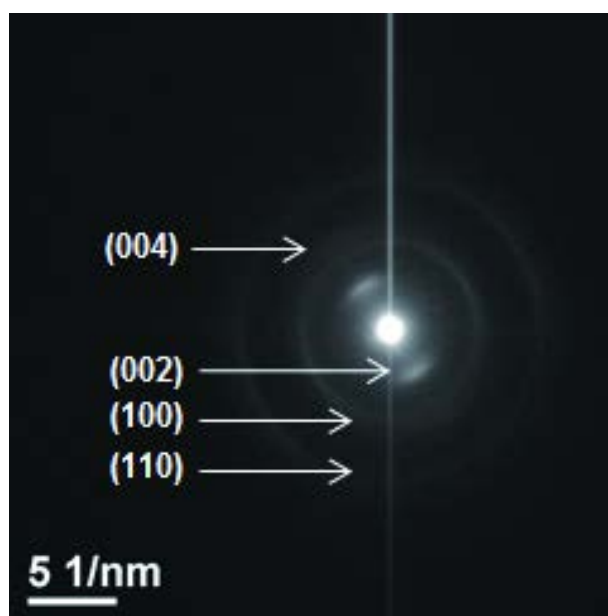

(b)

**Fig. S1** The microstructure of the desized CF surface  
(a) HR-TEM image and (b) electron diffraction pattern.

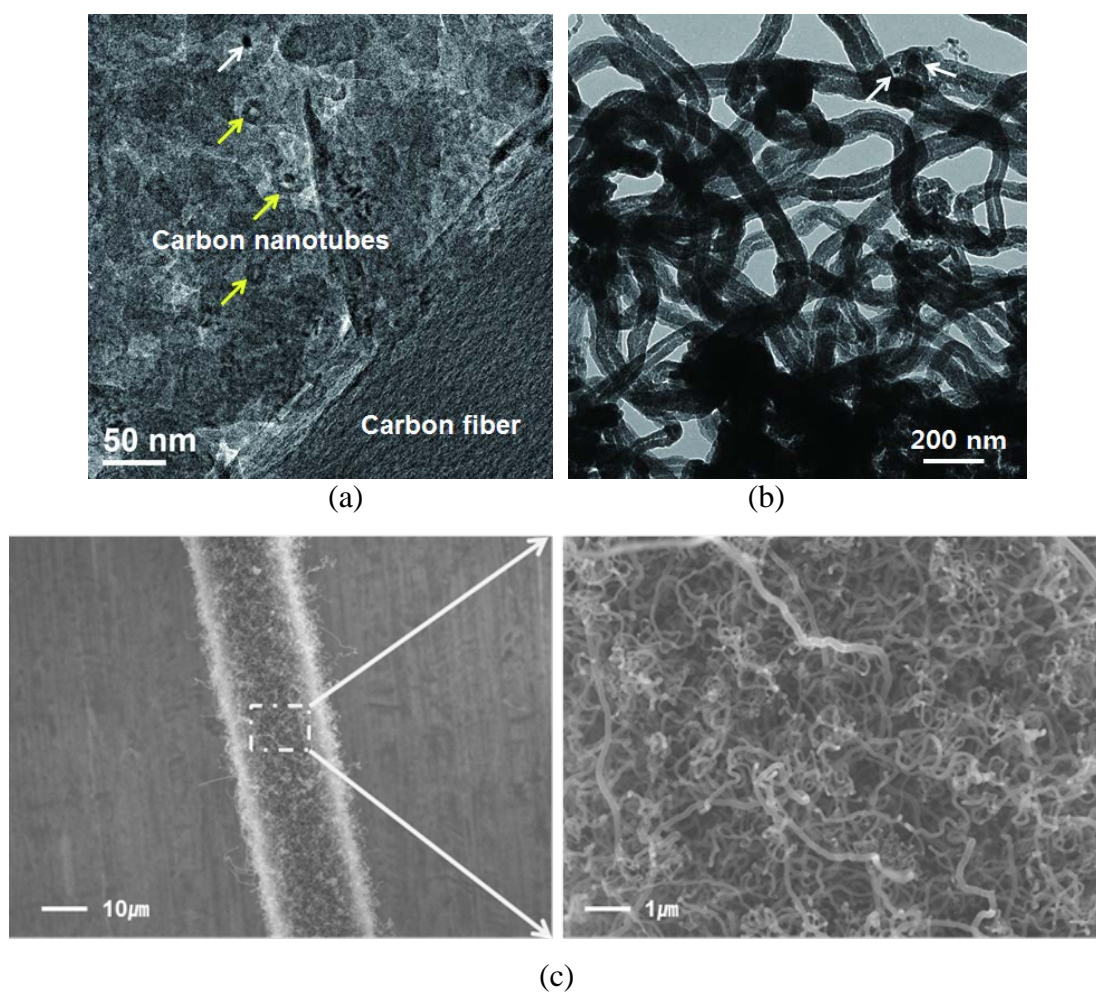

**Fig. S2** TEM images of (a) a cross-section of the CF-CNT interface and of (b) the CNTs. (c) FE-SEM images of CNTs grown on CF surface. The yellow arrows in (a) indicate the cross-section of the CNTs and the white arrows in (a) and (b) indicate the nanoparticles.

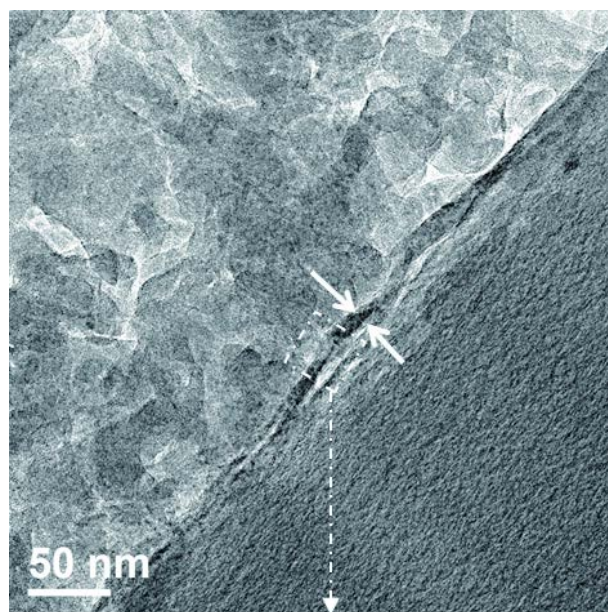

(a)

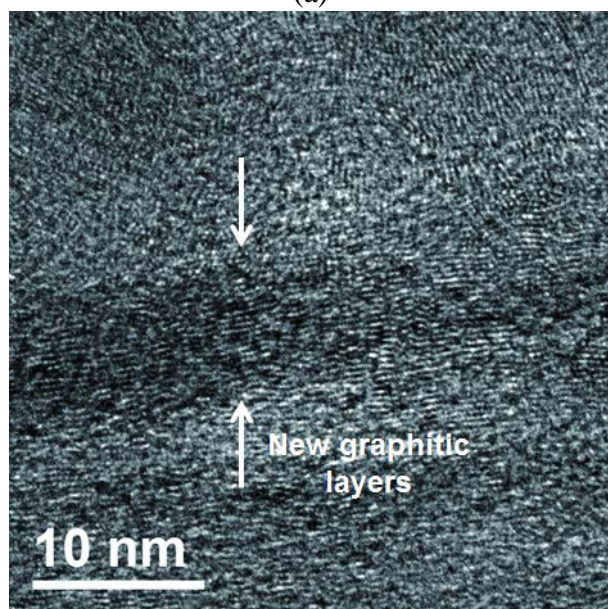

(b)

**Fig S3** (a) The interface between a CNT and a CF surface with new graphitic layers, and (b) a magnified image of (a).

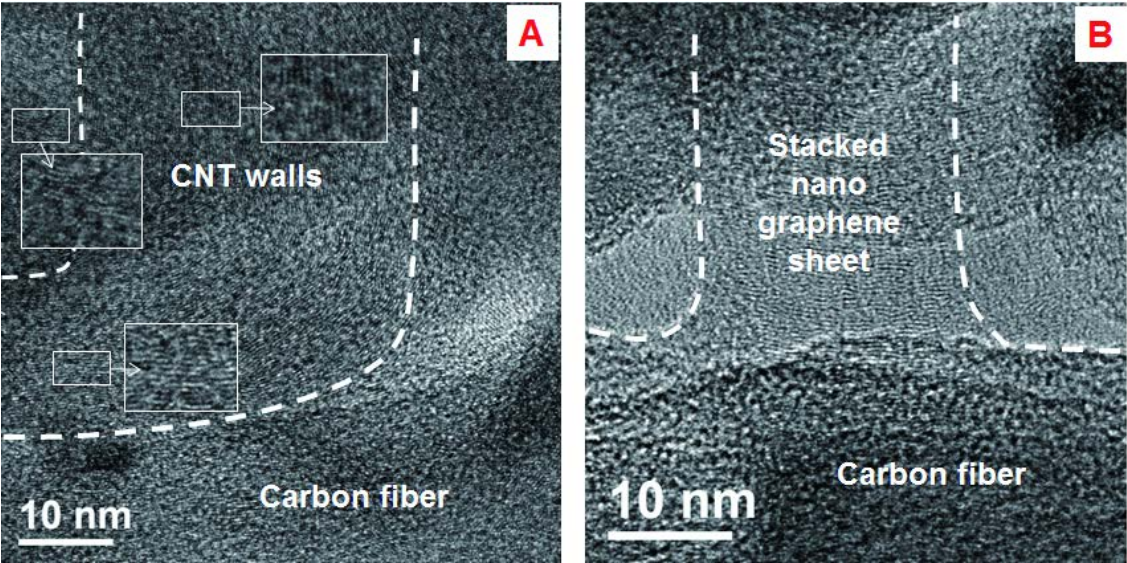

(a)

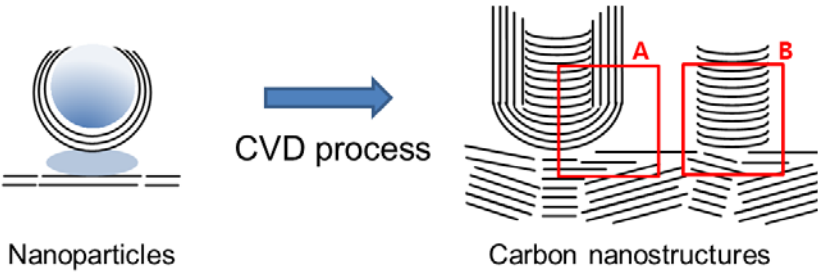

(b)

**Fig. S4** (a) TEM images of CNTs cultivated from Type II nanoparticles and (b) schematic diagrams explain the CNT morphologies.
